# Supplementary material for: Preparation of carbon nanotube-supported α-Fe2O3@CuO nanocomposite: a highly efficient and magnetically separable catalyst in cross-coupling of aryl halides with phenols
Source: Royal Society of Chemistry journal article supplement (doi:10.1039/c3cy00082f), 2013-01-01

Supporting Information for:

# Preparation of Carbon Nanotube-Supported $\alpha$ - $\text{Fe}_2\text{O}_3$ @CuO Nanocomposite: A Highly Efficient and Magnetically Separable Catalyst 5 in Cross-Coupling of Aryl Halides with Phenols

Dariush Saberi,<sup>a</sup> Mehdi Sheykhani,<sup>b</sup> Khodabakhsh Niknam,<sup>c</sup> and Akbar Heydari<sup>a,\*</sup>

<sup>a</sup>Chemistry Department, Tarbiat Modares University, P.O. Box 14155-4838 Tehran, Iran, Fax: (+98)-21- 82883455; phone:  
10 (+98)-21-82883444; email: heydar\_a@modares.ac.ir

<sup>b</sup>Chemistry Department, Guilan University, P.O.Box 41335-1914 Rasht, Iran

<sup>c</sup>Chemistry Department, Faculty of Sciences, Persian Gulf University, Bushehr, 75169, Iran

15

|                                                                                                                        |
|------------------------------------------------------------------------------------------------------------------------|
| <b><i>Table of Content</i></b>                                                                                         |
| <i>Experimental</i>                                                                                                    |
| <i>Preparation of carbon nanotube-supported <math>\alpha</math>-<math>\text{Fe}_2\text{O}_3</math></i>                 |
| <i>Synthesis of Carbon nanotube-supported <math>\alpha</math>-<math>\text{Fe}_2\text{O}_3</math>@CuO nanoparticles</i> |
| <i>Recyclability test of Catalyst</i>                                                                                  |
| <i>Spectrum Information of diarylether derivatives</i>                                                                 |
| <i><sup>1</sup>H NMR and <sup>13</sup>C NMR Spectrum of diarylether derivatives</i>                                    |

20

25

30

35

40

## Experimental

All reagents were purchased from commercial suppliers and used without further purification. Multi wall carbon nanotubes used in this work incorporate 3.06 wt% of OH with an external diameter 10-20 nm, internal diameter 5-10 nm and approximate length of 30 micrometres. All experiments were carried out under argon. Catalysts were characterized using spectroscopic techniques (FTIR, XRD, BET, BJH, ICP, VSM, SEM and TEM). FT-IR spectra were obtained over the region 400-4000  $\text{cm}^{-1}$  with NICOLET IR100 FT-IR with spectroscopic grade KBr. Powder XRD spectrum was recorded at r.t by a Philips X'pert 1710 diffractometer using Cu  $K\alpha$  ( $\lambda = 1.54056 \text{ \AA}$ ) in Bragg-Brentano geometry ( $\theta$ -2 $\theta$ ). The BET specific surface area, pore volume and average pore size were determined by physical adsorption of  $\text{N}_2$  at  $-196^\circ \text{C}$  in an automatic volumetric system using Belsorp instrument. ICP analysis was accomplished using a VISTA-PRO, CCD simultaneous ICP analyser. Magnetic properties of catalyst were obtained by homemade VSM. SEM image was observed using SEM (Philips XL 30 and S-4160) with gold coating equipped with energy dispersive X-ray spectroscopy (EDX). TEM measurements were carried out at 120 kV (Philips, model CM120).  $^1\text{H}$  and  $^{13}\text{C}$  NMR spectra were recorded on a Bruker Avance (DRX 500 MHz) and Bruker Ultrashield (400 MHz) in pure deuterated  $\text{CDCl}_3$  solvent with tetramethylsilane (TMS) as internal standards.

### *Preparation of carbon nanotube-supported $\alpha\text{-Fe}_2\text{O}_3$*

$\text{FeSO}_4 \cdot 7\text{H}_2\text{O}$  (1.00 g, 3.6 mmol) was dissolved into 10 mL distilled water and then multiwall carbon nanotubes (0.200 g) were added into solution. The complex was sonicated for 5 min, and then hydrogen peroxide (30 mL, 30%) was dripped slowly into the above complex with vigorous stirring and refluxed at 353 K for 4 h. The black complex was collected by decantation, washed with distilled water, and subsequently treated in an oven at 393 K for 12 h. This resulting nanocomposite ( $\text{CNT}@\text{Fe}(\text{OH})_{3.x}\text{H}_2\text{O}$ ) was then exposed to argon atmosphere at 450  $^\circ\text{C}$  giving rise to a carbon nanotube-supported  $\alpha\text{-Fe}_2\text{O}_3$  compound.

*Synthesis of Carbon nanotube-supported  $\alpha$ -Fe<sub>2</sub>O<sub>3</sub>@CuO nanoparticles*

To a magnetically stirred mixture of Cu(OAc)<sub>2</sub>.H<sub>2</sub>O (0.4 g, 2.2 mmol) in deionized water (100 mL), carbon nanotube-supported  $\alpha$ -Fe<sub>2</sub>O<sub>3</sub> (0.4 g) was added and then the solution was heated to 100 °C. After hydrolysis and crystallization for 5 h, the black precipitate formed in the solution was magnetically decanted, washed repeatedly with distilled water and absolute ethanol, and dried in air at room temperature.

*Recyclability test of Catalyst*

Upon completion of the first reaction between iodobenzene and phenol to afford a quantitative yield of the corresponding aryl ether (92% yield), the catalyst was recovered by external magnet, washed with 10 H<sub>2</sub>O and ethanol and oven dried at 80 °C overnight. A new reaction was then performed with fresh solvent and reactants under identical conditions.

15

20

25

30

35

### Spectroscopic data of products:

**Diphenyl ether.** Following the general procedure using phenol (94 mg, 1mmol) and iodobenzene (0.05 mL, 0.5 mmol) provided 156.6 mg (92% yield) of the coupling product as a colorless liquid after purification by flash chromatography (pentane) of the crude oil.

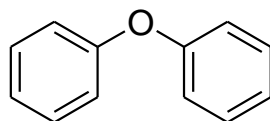

5

$^1\text{H}$  NMR ( $\text{CDCl}_3$ , 500 MHz)  $\delta$  7.05 (d,  $J=7.75$  Hz, 4H), 7.13 (t,  $J=7.35$ , 2H), 7.37 (t,  $J=7.55$  Hz, 4H),

$^{13}\text{C}$  NMR ( $\text{CDCl}_3$ , 125 MHz)  $\delta$  118.9, 123.2, 129.7, 157.3

All spectral data correspond to those given in the literature

**10 4-Methoxyphenyl phenyl ether.** Following the general procedure using 4-Methoxyphenol (124 mg, 1mmol) and iodobenzene (0.05 mL, 0.5mmol) provided 180 mg (90% yield) of the coupling product as a colorless liquid after purification by flash chromatography (pentane) of the crude oil.

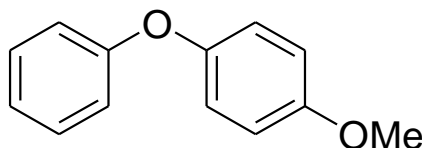

15  $^1\text{H}$  NMR ( $\text{CDCl}_3$ , 400 MHz)  $\delta$  3.73 (s, 3H), 6.78-6.82 (m, 2H), 6.85-6.92 (m, 4H), 6.96 (t,  $J=7.32$  Hz, 1H), 7.22 (t,  $J=7.32$  Hz, 2H);

$^{13}\text{C}$  NMR ( $\text{CDCl}_3$ , 100 MHz)  $\delta$  55.8, 114.9, 115.0, 117.7, 121.0, 122.4, 129.6, 129.8, 155.8;

All spectral data correspond to those given in the literature

**20 4-Nitrophenyl phenyl ether.** Following the general procedure using 4-Nitrophenol (139mg, 1mmol) and iodobenzene (0.05 mL, 0.5 mmol) provided 157 mg (73% yield) of the coupling product as a yellow solid after purification by flash chromatography (8:2 pentane/DCM) of the crude oil.

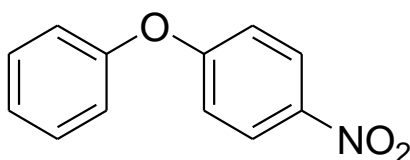

$^1\text{H}$  NMR ( $\text{CDCl}_3$ , 400 MHz)  $\delta$  6.89-6.93 (m, 2H), 7 (d,  $J=7.84$  Hz, 2H), 7.17 (t,  $J=7.56$  Hz, 1H), 7.34 (t,  $J=7.6$  Hz, 2H), 8.10 (d,  $J=9.36$  Hz, 2H);

$^{13}\text{C}$  NMR ( $\text{CDCl}_3$ , 100 MHz)  $\delta$  117.1, 120.6, 125.5, 126, 130.4, 142.6, 154.7, 163.4;

All spectral data correspond to those given in the literature

5

**4-Methylphenyl phenyl ether.** Following the general procedure using 4-Methylphenol (100 mg, 1 mmol) and iodobenzene (0.05 mL, 0.5 mmol) provided 175 mg (95% yield) of the coupling product as a colorless liquid after purification by flash chromatography (pentane) of the crude oil.

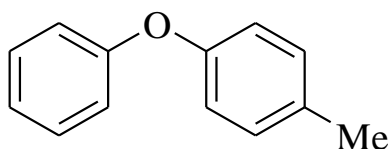

10

$^1\text{H}$  NMR ( $\text{CDCl}_3$ , 400 MHz):  $\delta=2.26$  (s, 3H), 6.84 (d,  $J=8.56$  Hz, 2H), 6.91 (d,  $J=8.56$  Hz, 2H), 6.99 (t,  $J=7.56$  Hz, 1H), 7.06 (d,  $J=8.1$  Hz, 2H), 7.24 (t,  $J=7.56$  Hz, 2H),

$^{13}\text{C}$  NMR ( $\text{CDCl}_3$ , 100 MHz):  $\delta=20.7$ , 118.3, 119.1, 122.8, 129.7, 130.2, 132.9, 154.7, 157.8

All spectral data correspond to those given in the literature

15

**4-Bromophenyl phenyl ether.** Following the general procedure using 4-Bromophenol (173 mg, 1 mmol) and iodobenzene (0.05 mL, 0.5 mmol) provided 149 mg (60% yield) of the coupling product as a colorless liquid after purification by flash chromatography (pentane) of the crude oil.

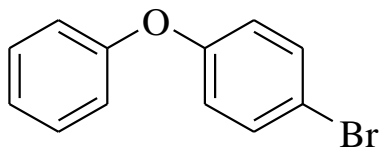

20

$^1\text{H}$  NMR ( $\text{CDCl}_3$ , 400 MHz):  $\delta=6.79$ -6.83 (m, 2H), 6.93 (d,  $J=7.56$  Hz, 2H), 7.05 (t,  $J=7.56$  Hz, 1H), 7.27 (t,  $J=7.57$  Hz, 2H), 7.33-7.37 (m, 2H),

$^{13}\text{C}$  NMR ( $\text{CDCl}_3$ , 100 MHz):  $\delta=115.6$ , 119.0, 120.4, 123.7, 129.9, 130.2, 132.7, 156.6, 156.7

All spectral data correspond to those given in the literature

25

**4-Ethylphenyl phenyl ether.** Following the general procedure using 4-Ethylphenol (122 mg, 1 mmol) and iodobenzene (0.05 mL, 0.5 mmol) provided 178 mg (90% yield) of the coupling product as a colorless liquid after purification by flash chromatography (pentane) of the crude oil.

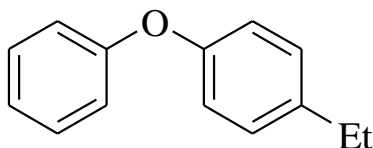

5

$^1\text{H}$  NMR ( $\text{CDCl}_3$ , 400 MHz):  $\delta$  = 1.16 (t,  $J$ =7.56 Hz, 3H), 2.56(q,  $J$ =7.56 Hz, 2H), 6.87 (d,  $J$ =8.32 Hz, 2H), 6.91 (d,  $J$ =7.84 Hz, 2H), 7.00 (t,  $J$ =7.32 Hz, 1H), 7.09 (d,  $J$ = 8.56 Hz, 2H), 7.27 (t,  $J$ = 7.32 Hz, 2H),

$^{13}\text{C}$  NMR ( $\text{CDCl}_3$ , 100 MHz):  $\delta$  = 15.8, 28.2, 118.4, 119.1, 122.8, 129.0, 129.7, 139.3, 154.9, 157.76.

10 All spectral data correspond to those given in the literature

**3,5-Dimethylphenyl phenyl ether.** Following the general procedure using 3,5-Dimethylphenol (122 mg, 1 mmol) and iodobenzene (0.05 mL, 0.5 mmol) provided 168 mg (85% yield) of the coupling product as a colorless oil after purification by flash chromatography (pentane) of the crude oil.

15

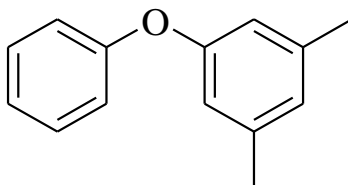

$^1\text{H}$  NMR ( $\text{CDCl}_3$ , 400 MHz)  $\delta$  = 2.20 (s, 6H), 6.56 (s, 2H), 6.67 (s, 1H), 6.92 (d,  $J$ =7.56 Hz, 2H), 7.01 (t,  $J$ =7.32 Hz, 1H), 7.23-7.27 (m, 2H),

$^{13}\text{C}$  NMR ( $\text{CDCl}_3$ , 100 MHz)  $\delta$  = 21.3, 116.6, 118.9, 123, 124.9, 129.7, 139.6, 157.1, 157.4

20

**2-Naphthyl phenyl ether.** Following the general procedure using 2-naphthol (144 mg, 1mmol) and iodobenzene (0.05 mL, 0.5 mmol) provided 209 mg (95% yield) of the coupling product as a Pale yellow colored solid after purification by flash chromatography (pentane) of the crude oil.

25

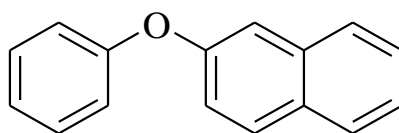

$^1\text{H}$  NMR ( $\text{CDCl}_3$ , 400 MHz)  $\delta$  = 7 (d,  $J$  = 7.56, 2H), 7.06 (t,  $J$  = 7.56 Hz, 1H), 7.17-7.39 (m, 6H), 7.62 (d,  $J$  = 7.8 Hz, 1H), 7.73-7.77 (m, 2H),

$^{13}\text{C}$  NMR ( $\text{CDCl}_3$ , 100 MHz): = 114.1, 119.2, 120.0, 123.5, 124.7, 126.5, 127.1, 127.8, 129.8, 129.9, 130.2, 134.3, 155.1, 157.2.

All spectral data correspond to those given in the literature

**10 2-Methylphenyl phenyl ether.** Following the general procedure using Phenol (94 mg, 1 mmol) and 2-iodotoluene (0.064 mL, 0.5 mmol) provided 129 mg (70% yield) of the coupling product as a colorless liquid after purification by flash chromatography (pentane) of the crude oil.

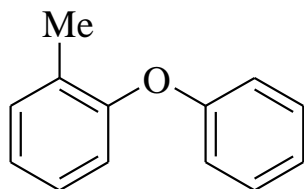

$^1\text{H}$  NMR ( $\text{CDCl}_3$ , 400 MHz)  $\delta$  = 2.17 (s, 3H), 6.82-6.84 (m, 3H), 6.95-7.01 (m, 2H), 7.1 (t,  $J$  = 6.28 Hz, 1H), 7.17-7.24 (m, 3H);

$^{13}\text{C}$  NMR ( $\text{CDCl}_3$ , 100 MHz)  $\delta$  = 16.2, 117.3, 119.8, 122.3, 124.0, 127.1, 129.7, 131.5, 131.46, 154.6, 157.8;

All spectral data correspond to those given in the literature

20

**3-Methylphenyl phenyl ether.** Following the general procedure using phenol (94 mg, 1 mmol) and 3-bromotoluene (0.06 mL, 0.5 mmol) provided 133 mg (72% yield) of the coupling product as a colorless liquid after purification by flash chromatography (pentane) of the crude oil

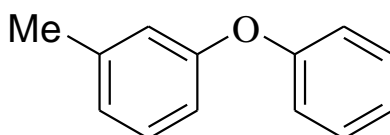

25

$^1\text{H}$  NMR ( $\text{CDCl}_3$ , 500 MHz)  $\delta$  2.35 (s, 3H), 6.78-6.85(m, 2H), 6.90-6.94 (m, 1H), 7.00-7.03 (m, 2H), 7.11 (t,  $J=7.4$  Hz, 1H), 7.22 (t,  $J=7.85$  Hz, 1H), 7.33-7.37 (m, 2H);

$^{13}\text{C}$  NMR ( $\text{CDCl}_3$ , 125 MHz)  $\delta$  21.5, 116.0, 119.0, 119.7, 123.2, 124.2, 129.6, 129.8, 140.1, 154.3, 157.5;

5 All spectral data correspond to those given in the literature

**3-Pyridine phenyl ether.** Following the general procedure using phenol (94 mg, 1 mmol) and 3-iodopyridine (102 mg, 0.5 mmol) provided 128 mg (75% yield) of the coupling product as a colorless oil after purification by flash chromatography (pentane) of the crude oil

10

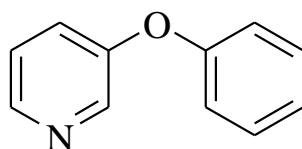

$^1\text{H}$  NMR ( $\text{CDCl}_3$ , 500 MHz)  $\delta$  7.03 (d,  $J=8.4$  Hz, 2H), 7.16 (t,  $J=7.4$ , 1H), 7.22-7.30 (m, 2H), 7.38 (t,  $J=8.3$ , 2H), 8.37 (br s, 1H), 8.42 (brs, 1H);

$^{13}\text{C}$  NMR ( $\text{CDCl}_3$ , 125 MHz)  $\delta$  119, 121.3, 124, 125, 130, 141, 144, 157.3, 157.5;

15

**5-Pyrimidine phenyl ether.** Following the general procedure using phenol (94 mg, 1 mmol) and 5-bromopyrimidine (79 mg, 0.5 mmol) provided 129 mg (75% yield) of the coupling product as a white solid crystal after purification by flash chromatography (pentane) of the crude oil

20

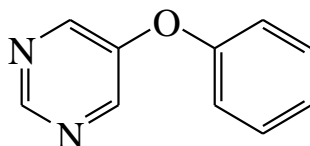

$^1\text{H}$  NMR ( $\text{CDCl}_3$ , 500 MHz)  $\delta$  7.06 (t,  $J=8.35$  Hz, 2H), 7.41-7.44 (m, 3H), 8.48(s, 2H), 8.97 (s, 1H);

$^{13}\text{C}$  NMR ( $\text{CDCl}_3$ , 125 MHz)  $\delta$  119.1, 123.2, 130.3, 144.4, 147.0, 153.2, 175.2;

25



# Diphenyl ether

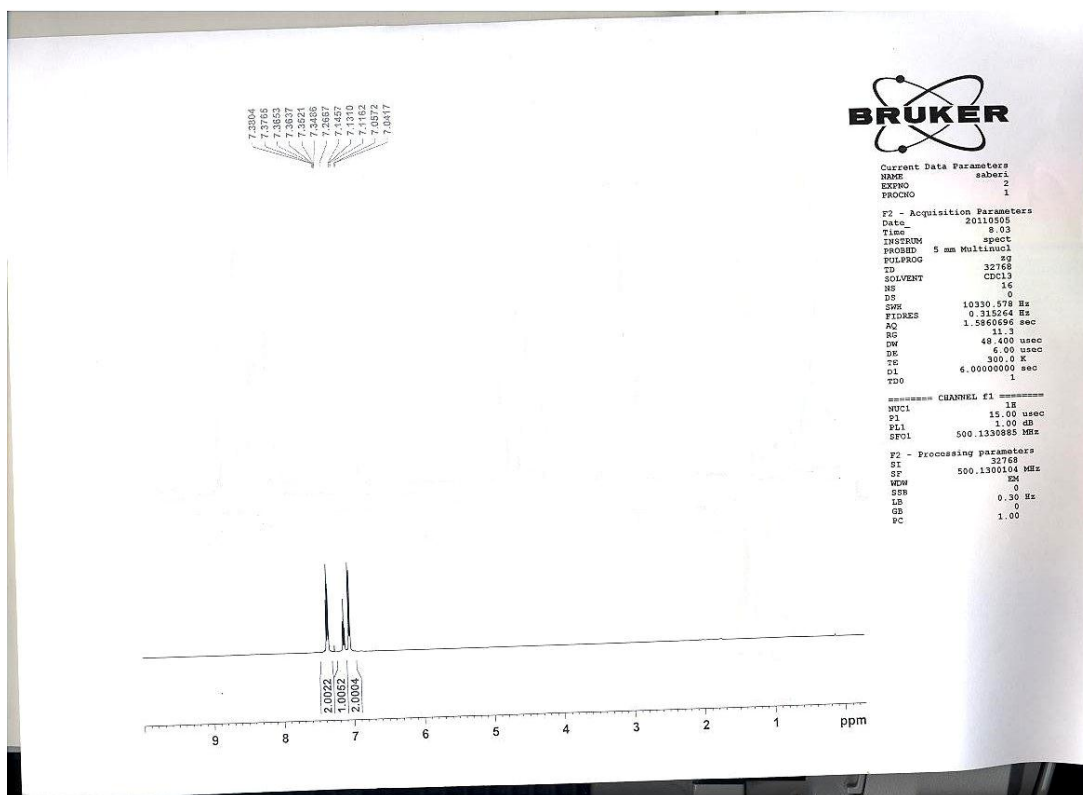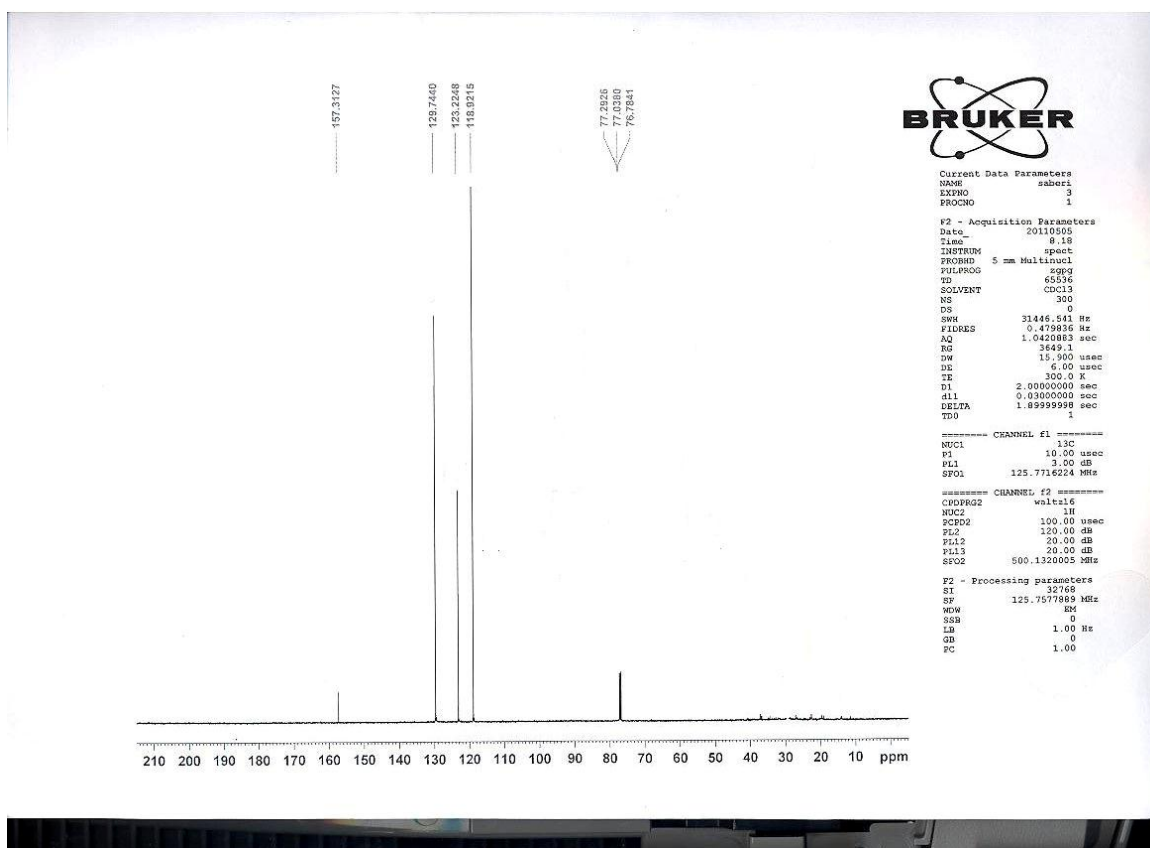

### 4-Methoxyphenyl phenyl ether

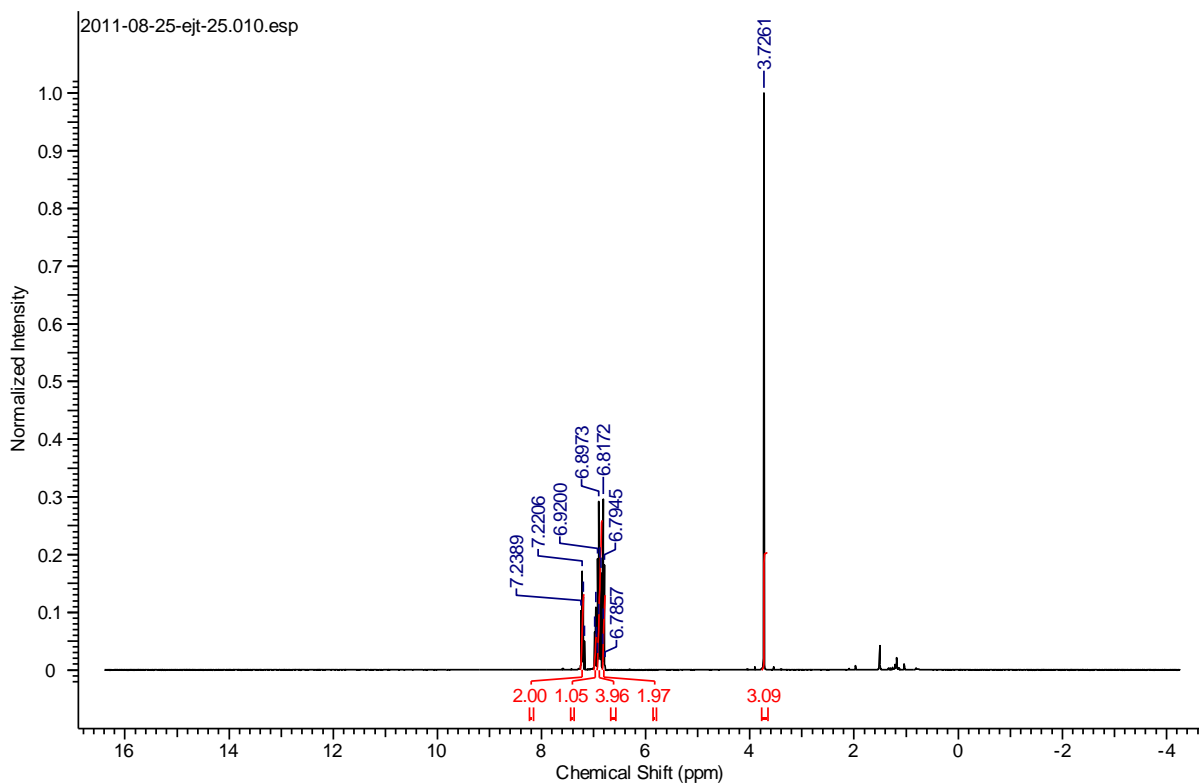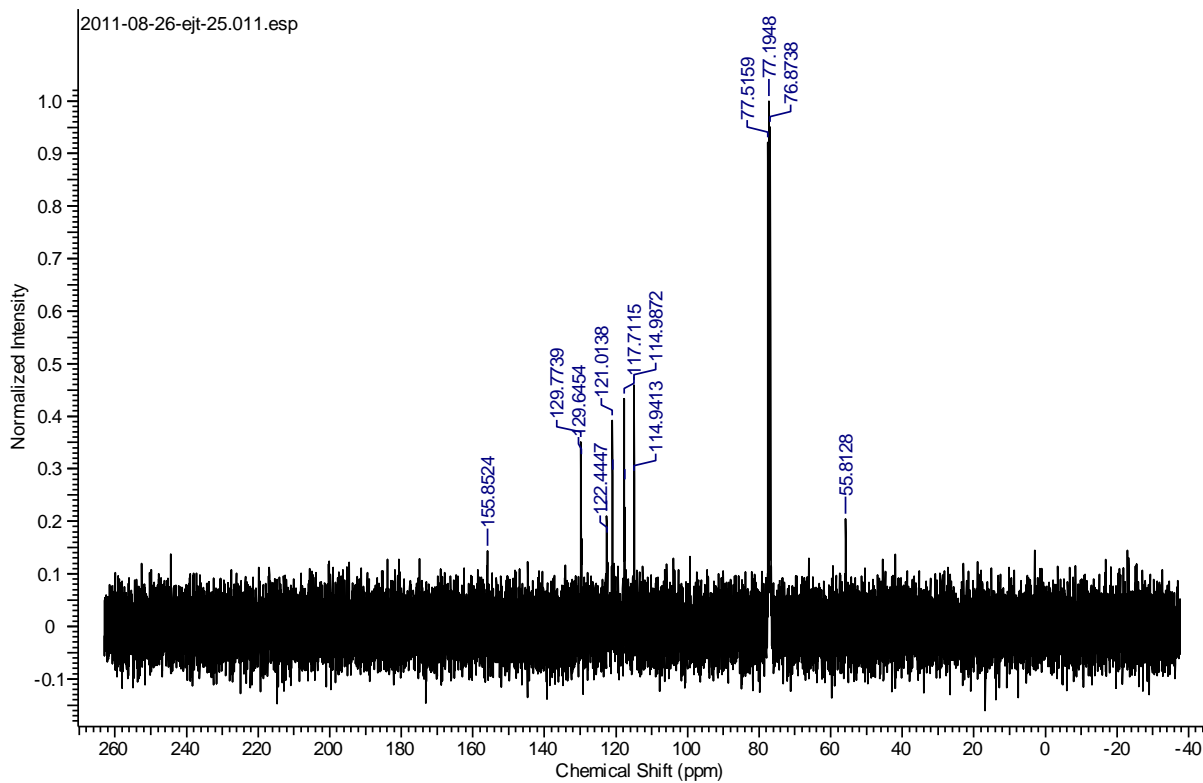

### 4-Nitrophenyl phenyl ether

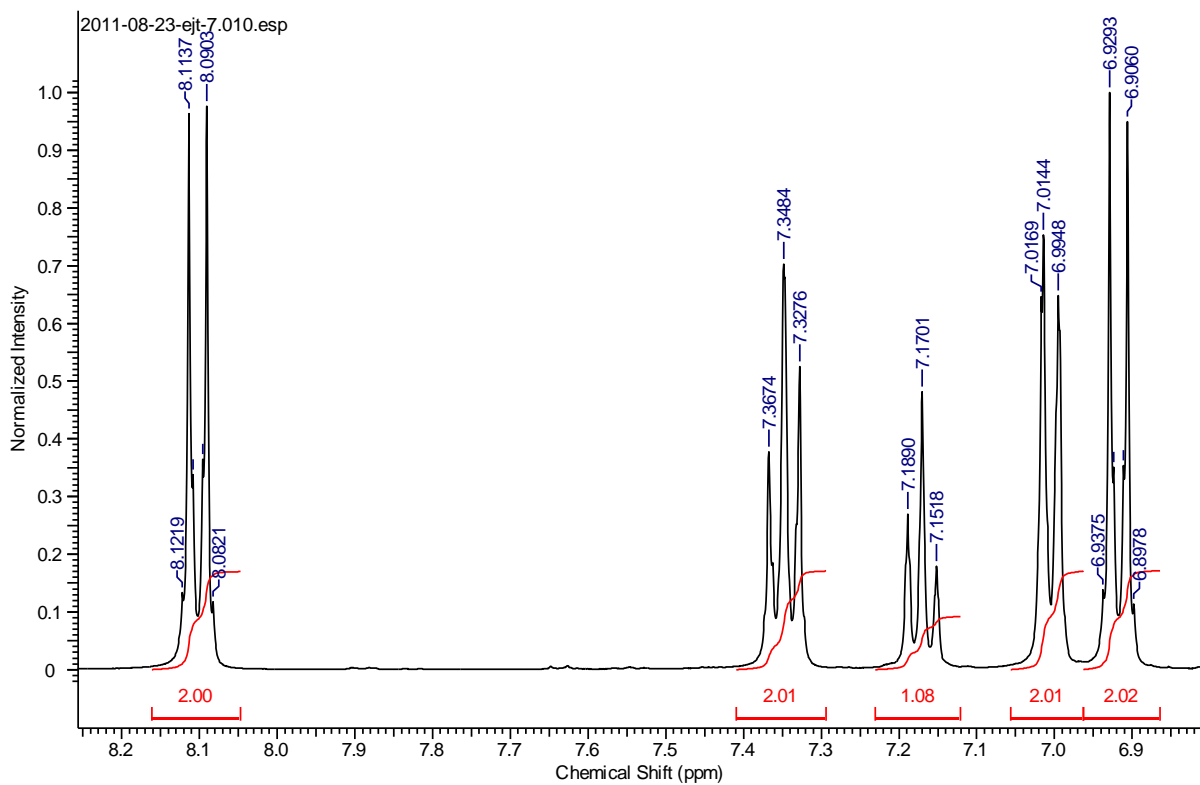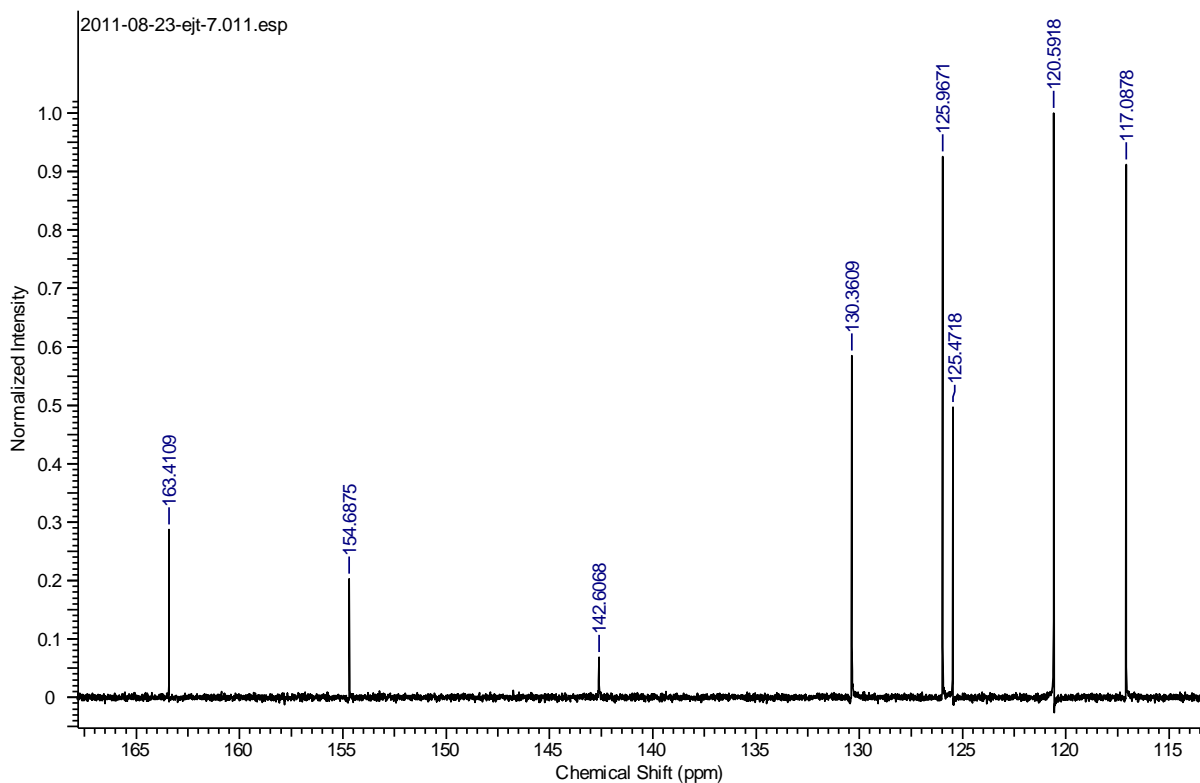

## 4-Methylphenyl phenyl ether

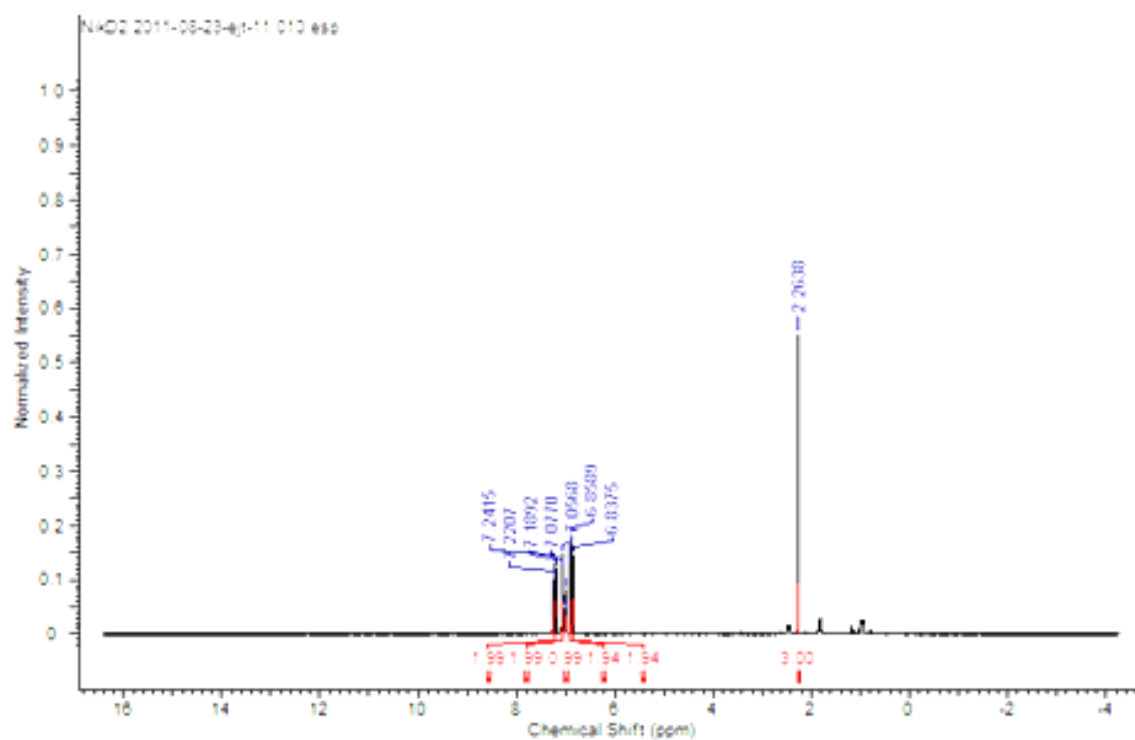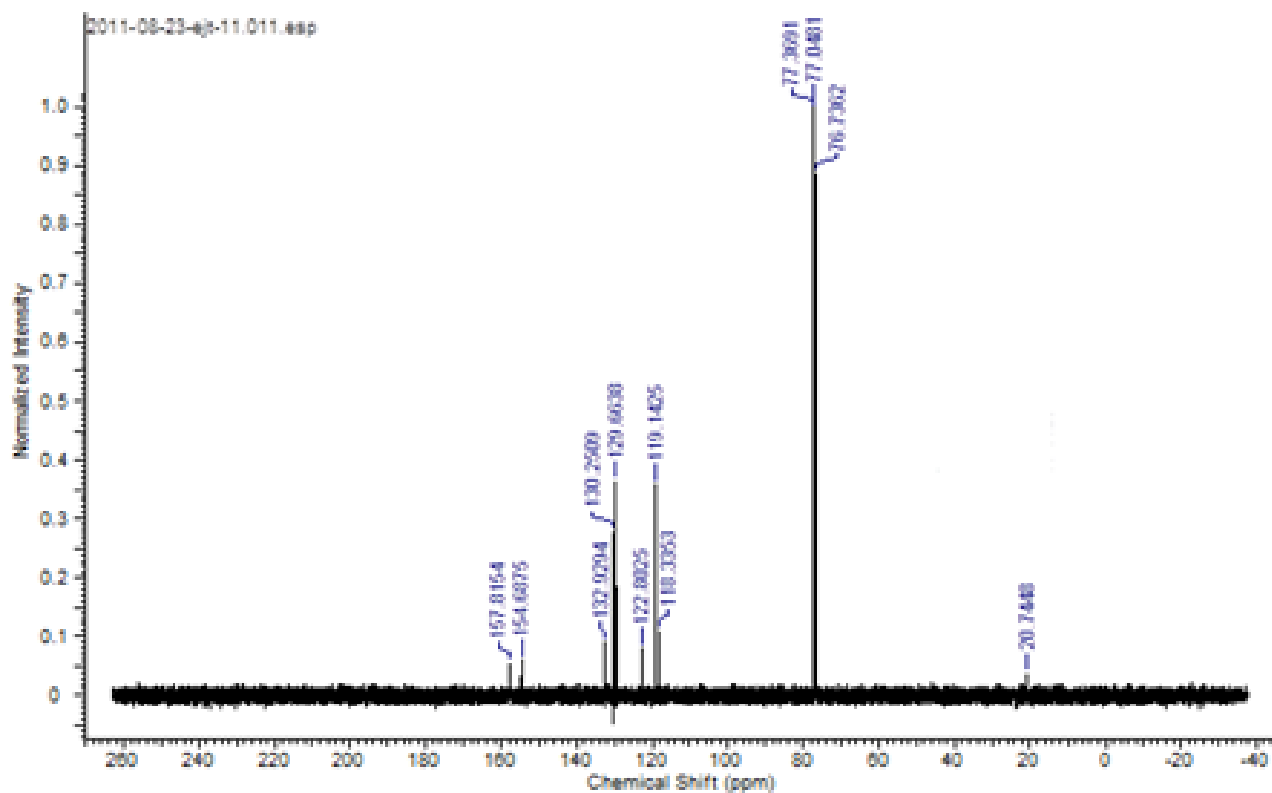

### 4-Bromophenyl phenyl ether

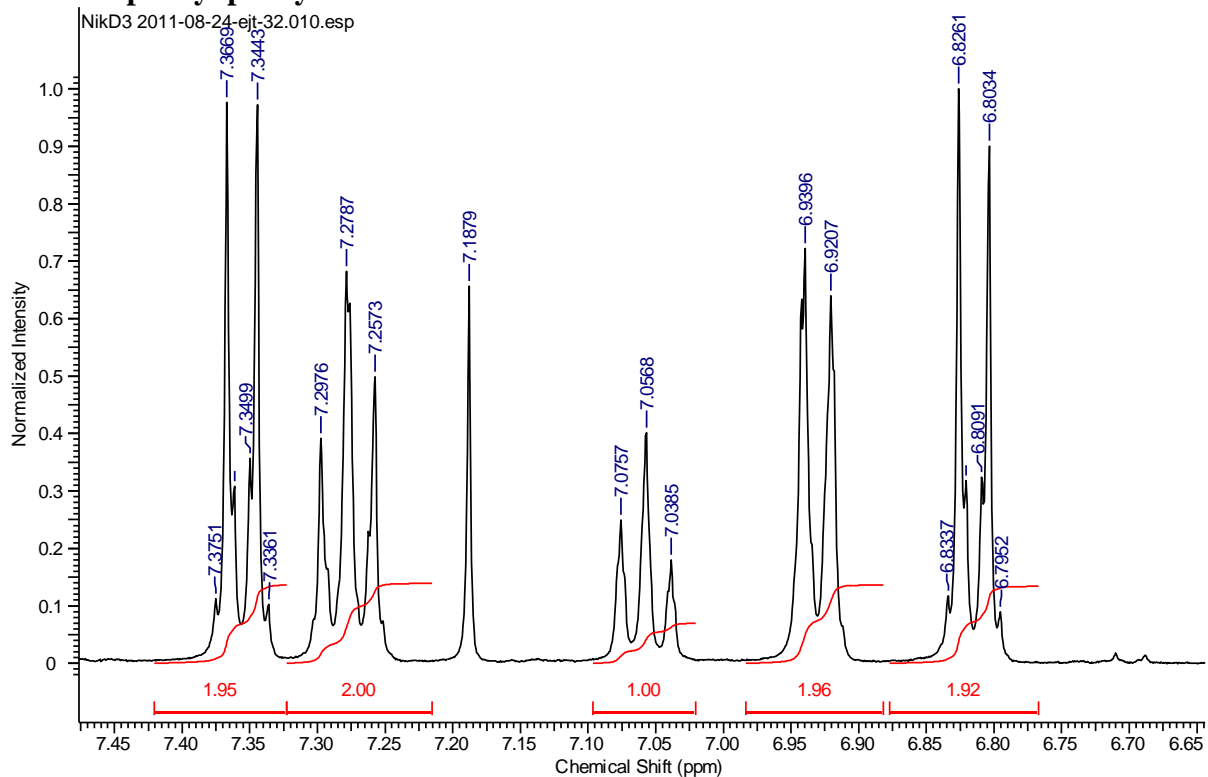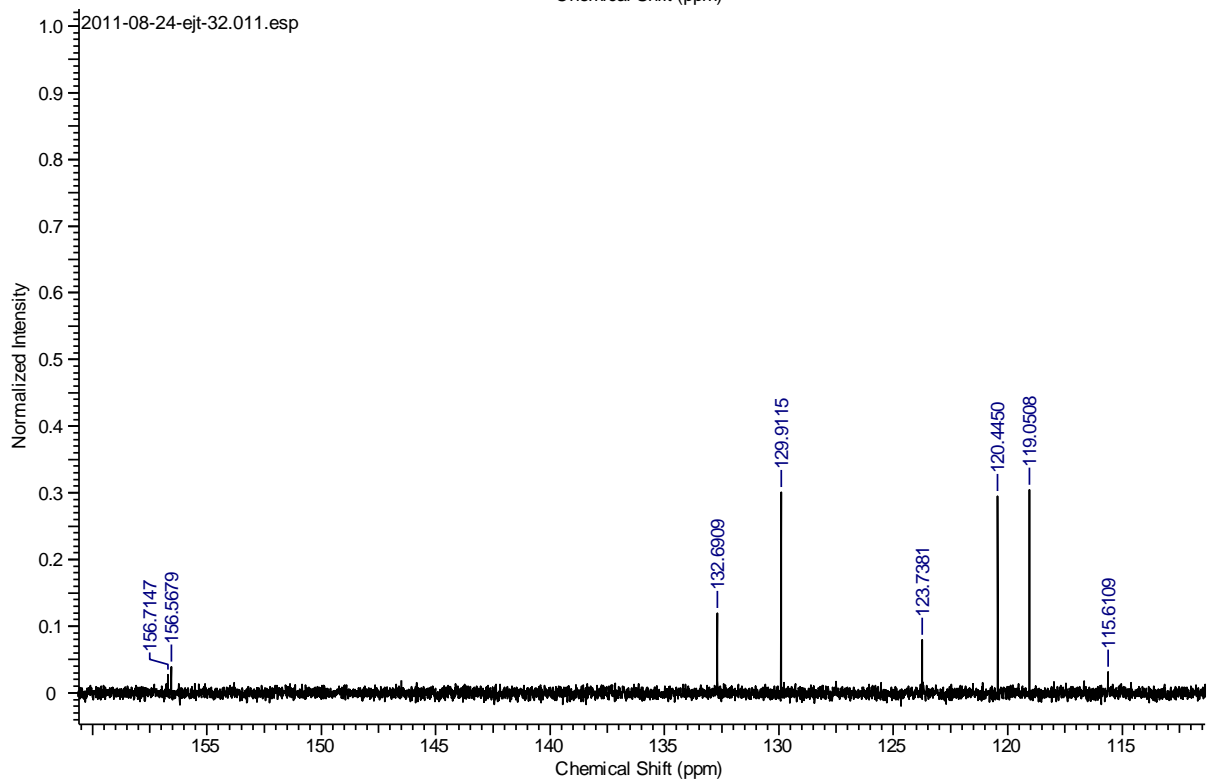

## 4-Ethylphenyl phenyl ether

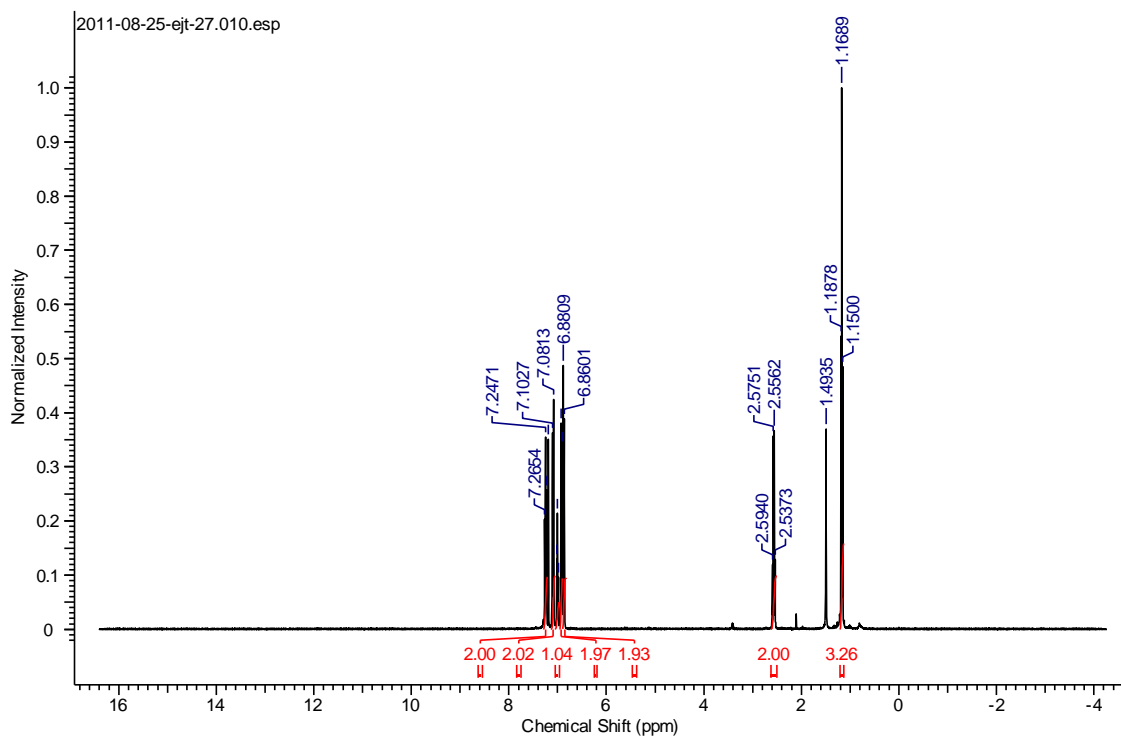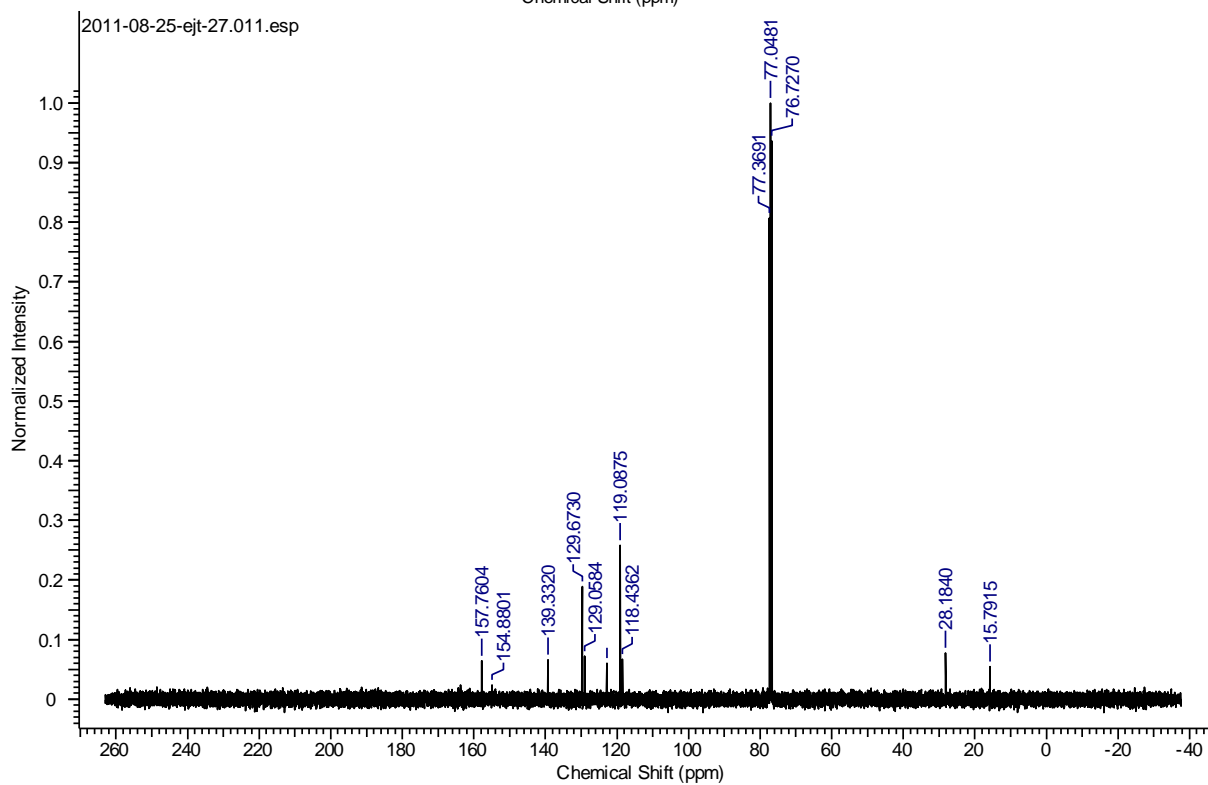

### 3,5-Dimethylphenyl phenyl ether

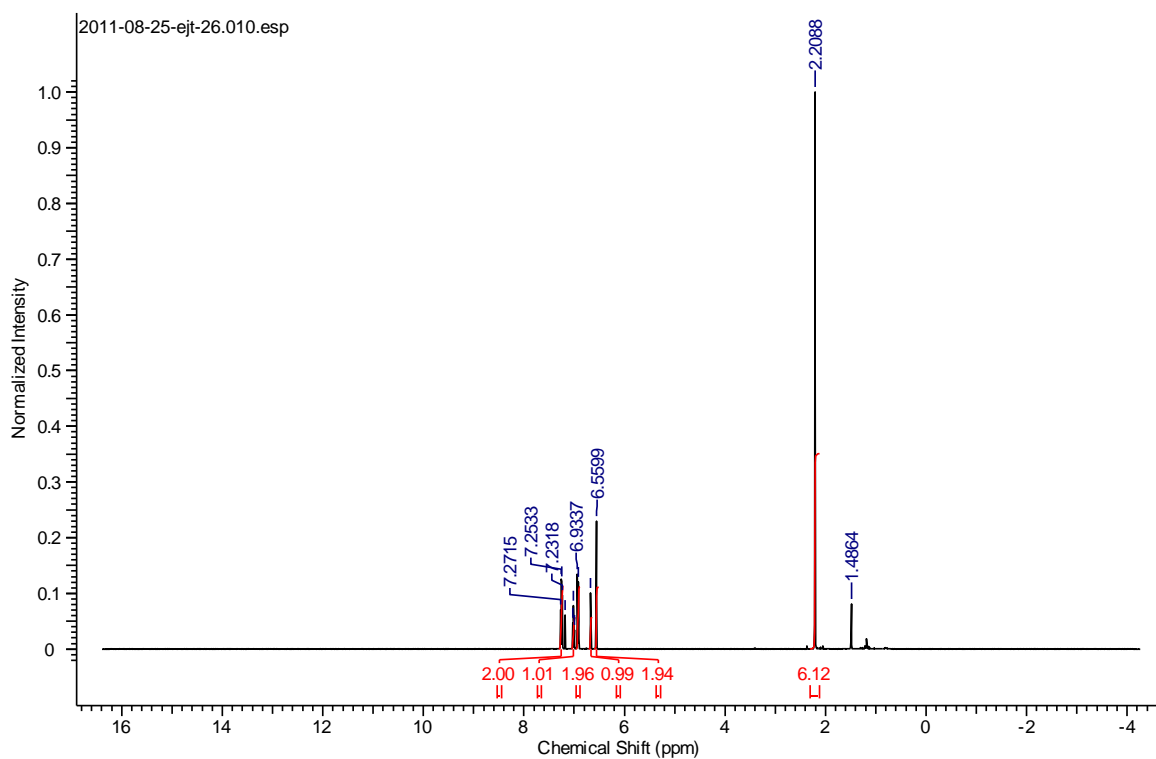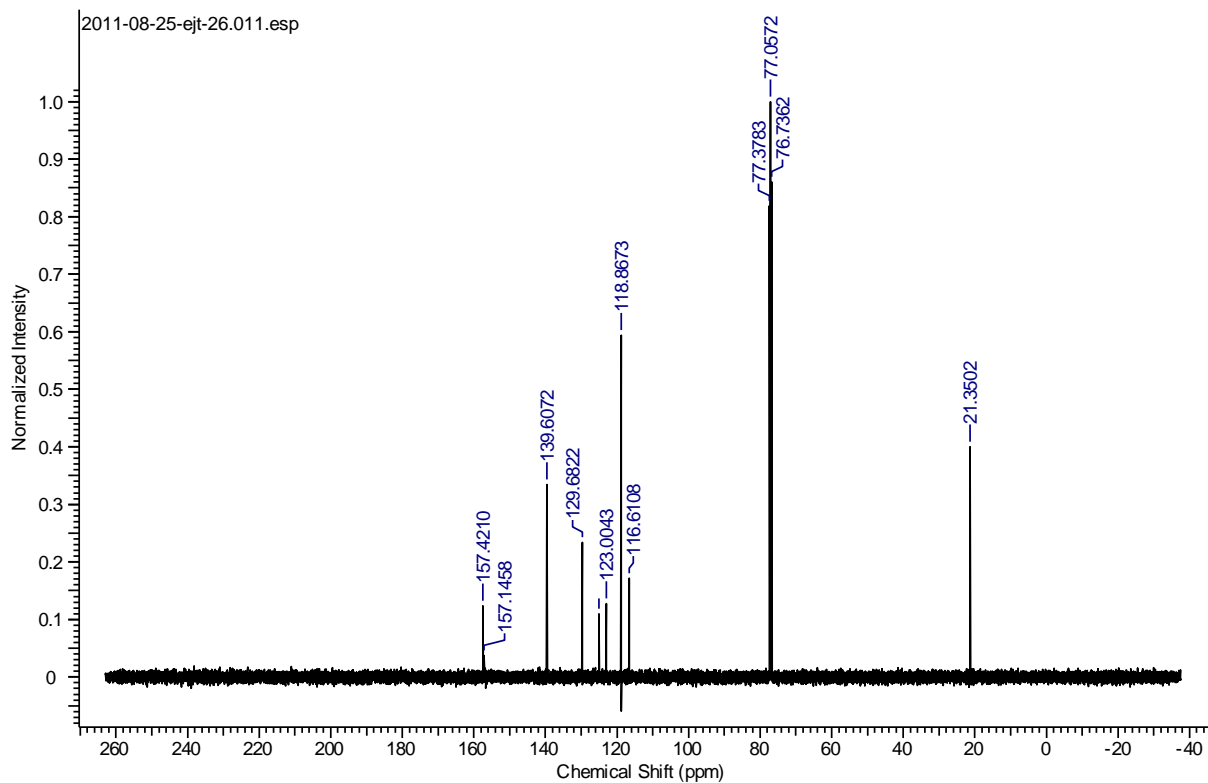

## 2-Naphthyl phenyl ether

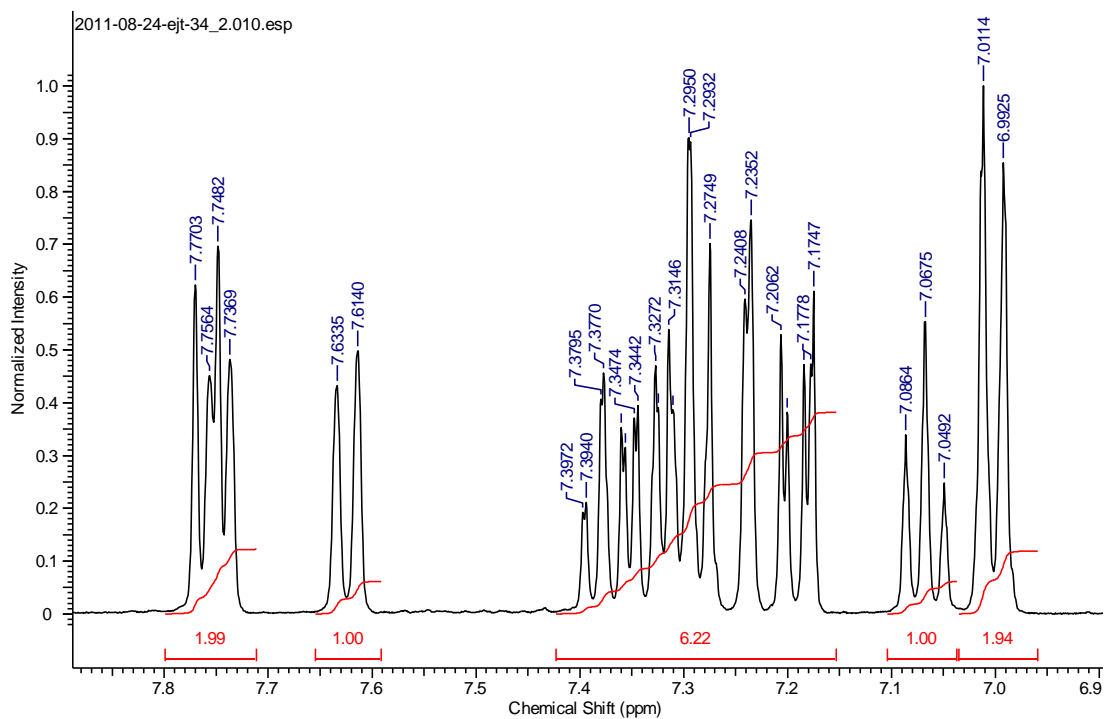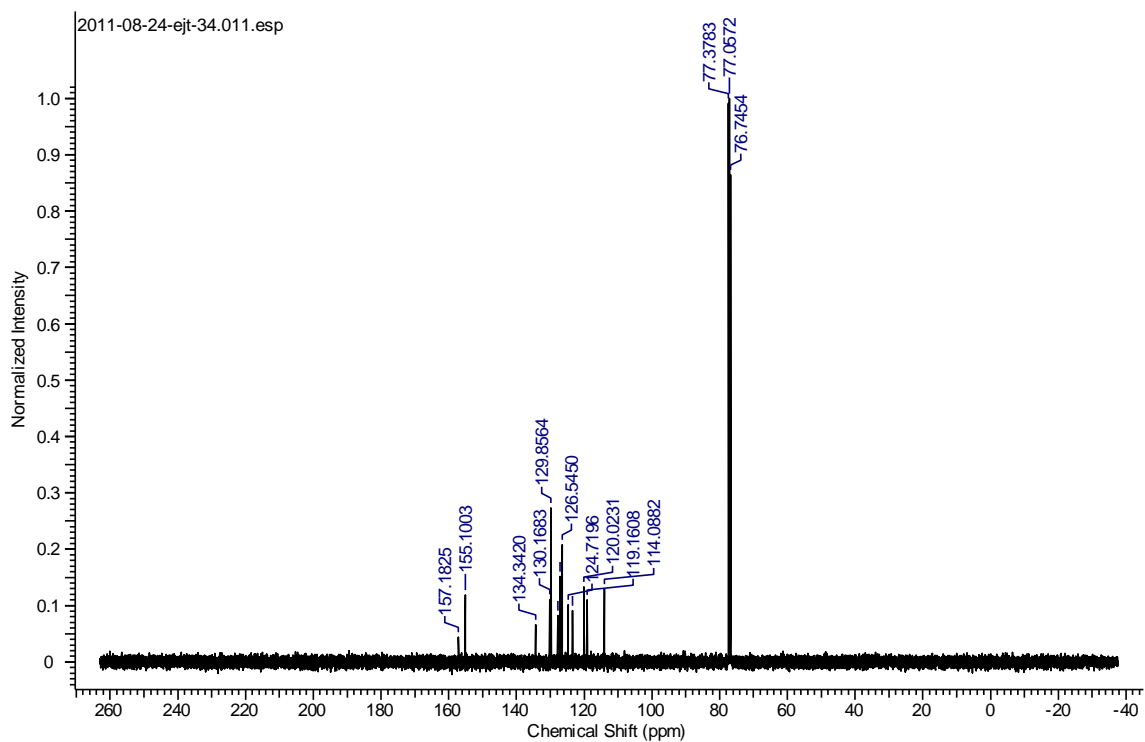

5

10



## 2-Methylphenyl phenyl ether

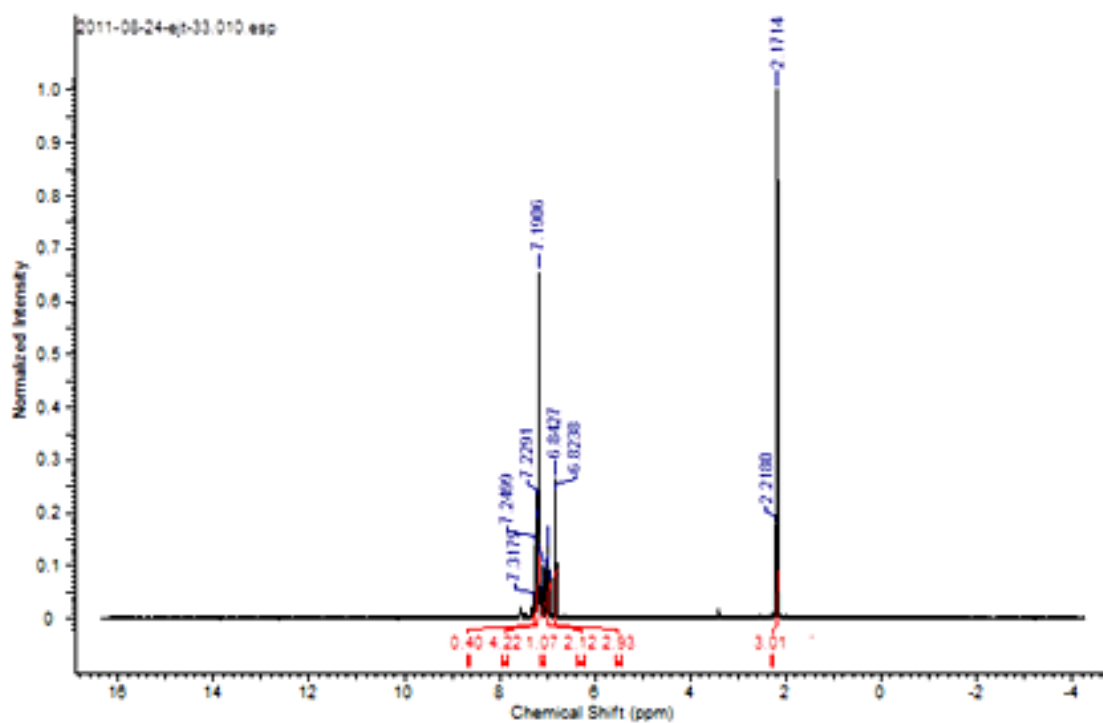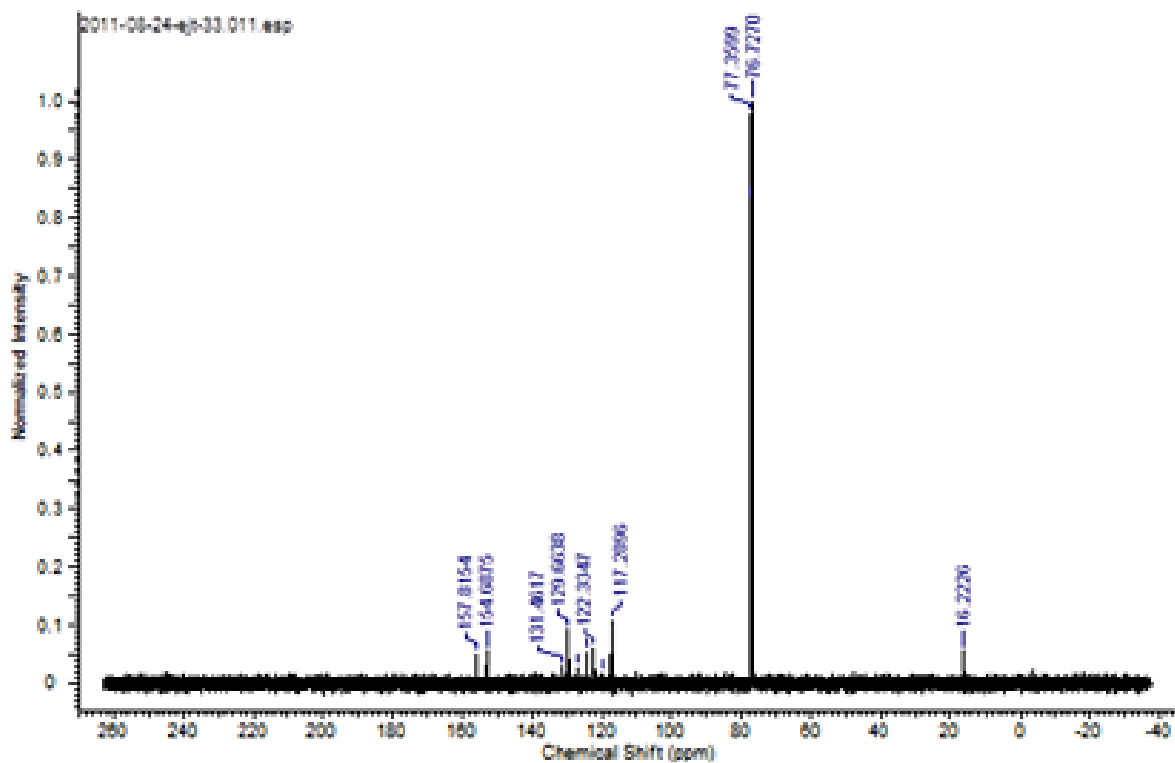

### 3-Methylphenyl phenyl ether

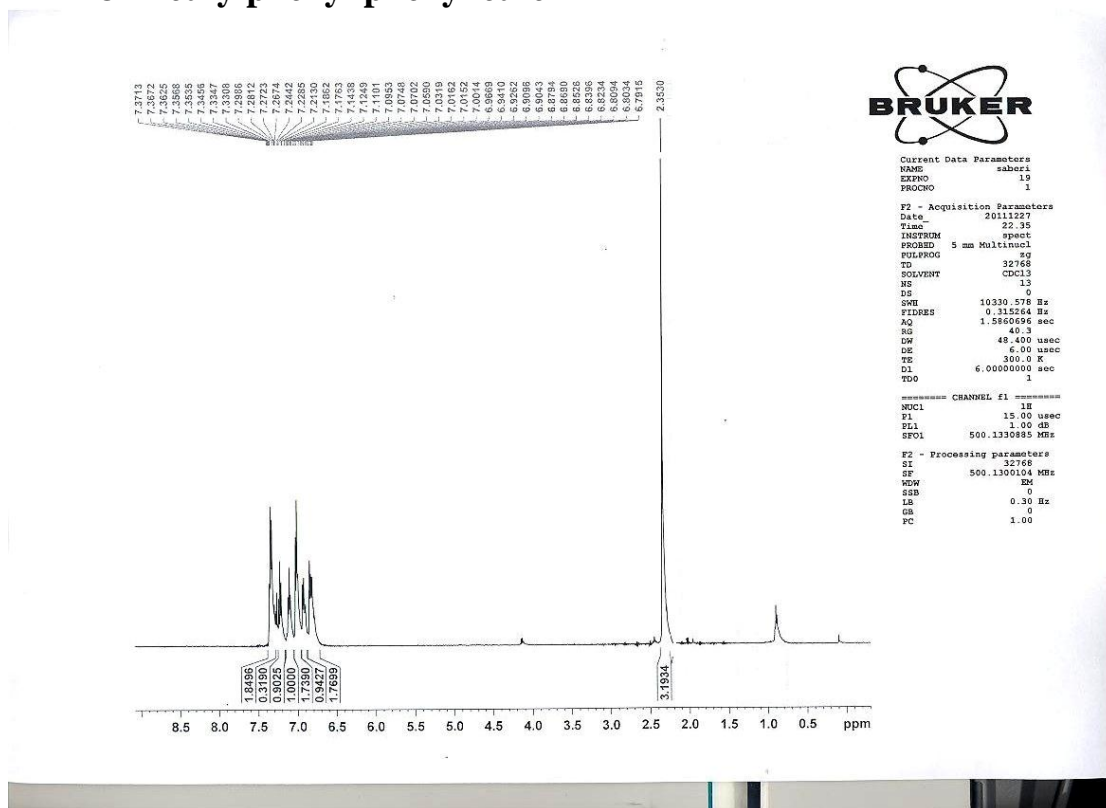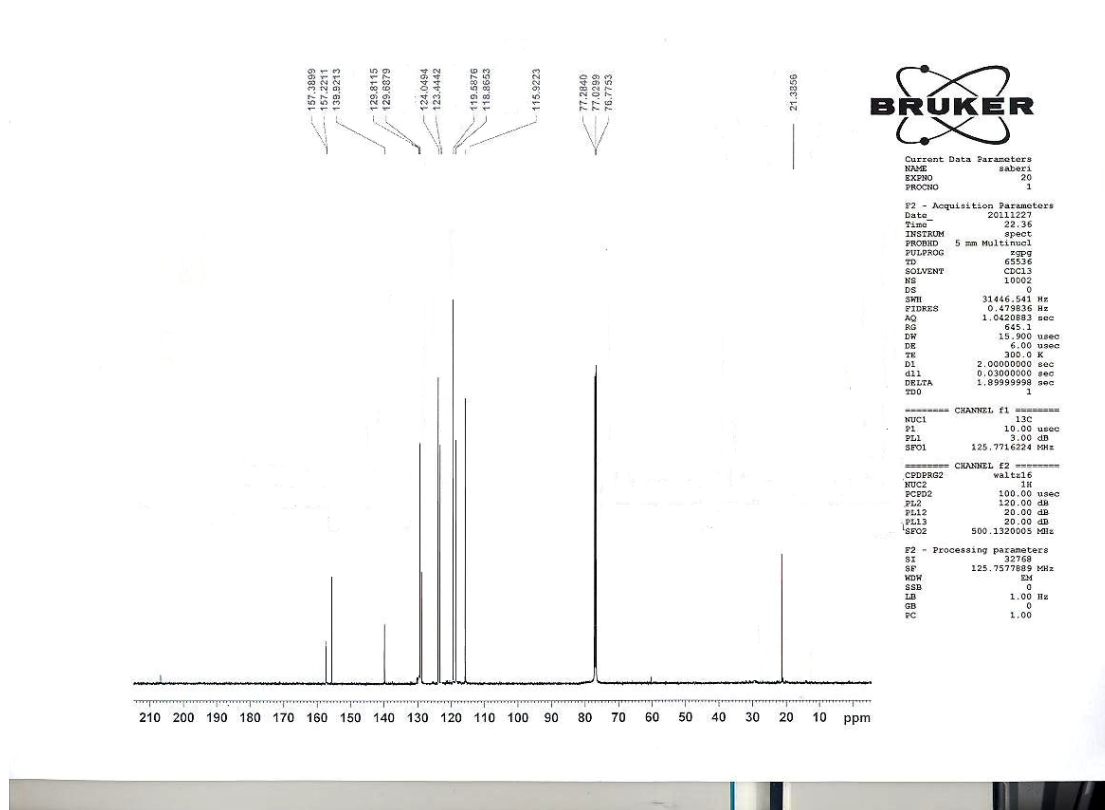

### 3-Pyridine phenyl ether

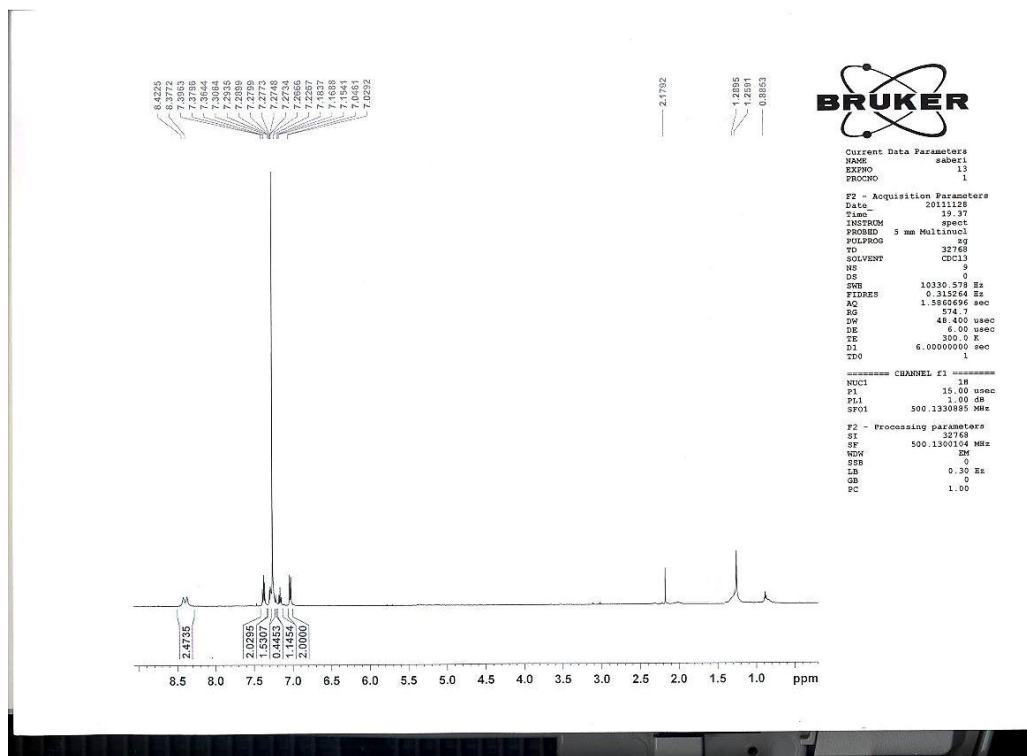

5

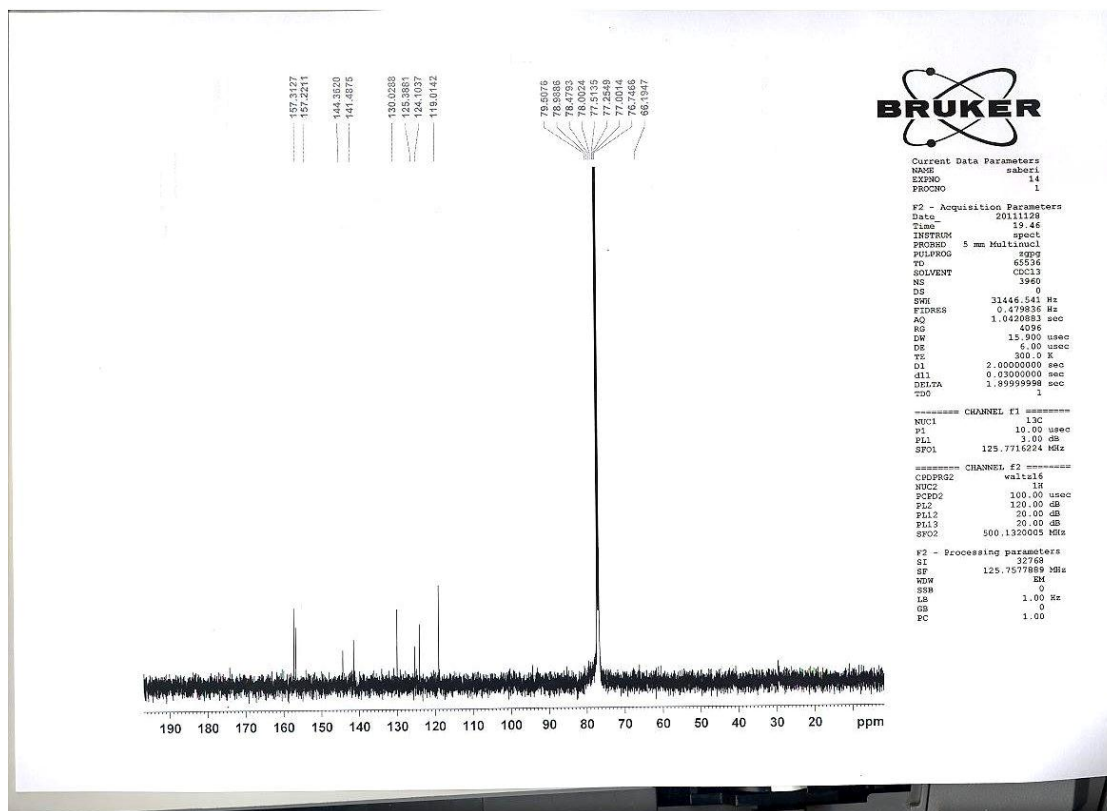

## 5-Pyrimidine phenyl ether

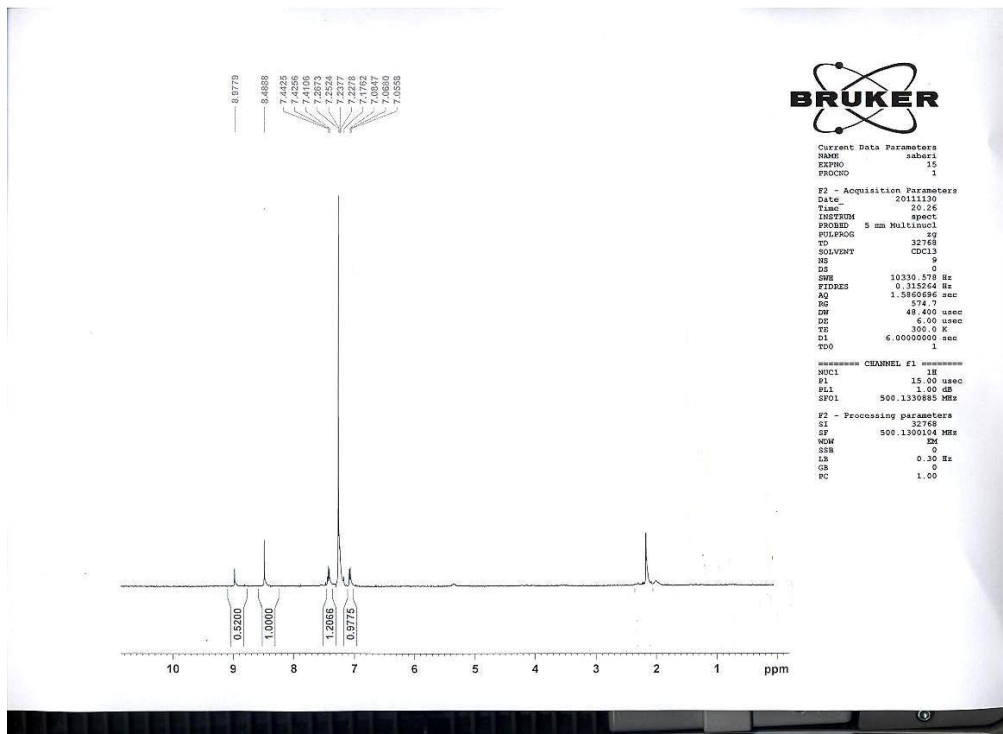

5

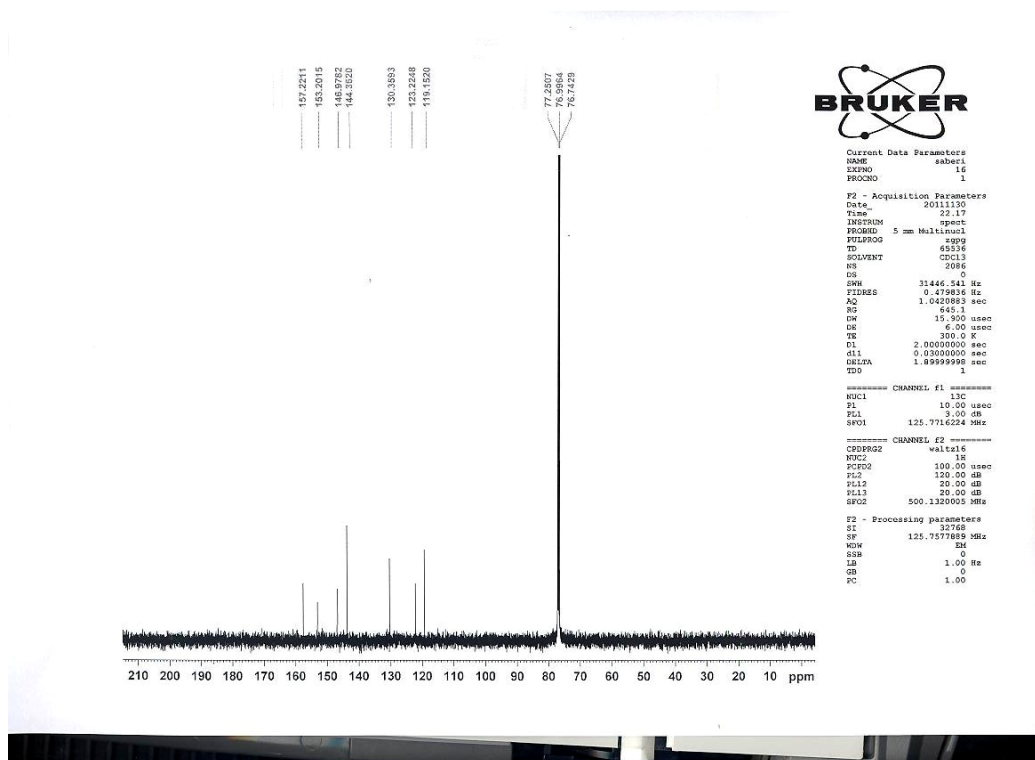

Supplement: c3cy00082f.pdf [file c3cy00082f.pdf]
